# Supplementary material for: Highly selective detection of Cu2+ utilizing specific binding between Cu-demetallated superoxide dismutase 1 and the Cu2+ ion via surface plasmon resonance spectroscopy
Source: Royal Society of Chemistry journal article supplement (doi:10.1039/b910666a), 2009-01-01

## Highly Selective Detection of $\text{Cu}^{2+}$ Utilizing Specific Binding between Cu-demetallated Superoxide Dismutase 1 and $\text{Cu}^{2+}$ ion via Surface Plasmon Resonance Spectroscopy

Suseung Lee<sup>a</sup>, Inhee Choi<sup>a</sup>, Surin Hong<sup>a</sup>, Young In Yang<sup>a</sup>, Jeongjin Lee<sup>a</sup>, Taewook Kang<sup>\*b</sup> and Jongheop Yi<sup>\*a</sup>

### ESI

**Fig. S1 Selectivity test in mixed metal ion solutions:** SPR reflectivity values at the fixed angle of the lower inflection point in each SPR curve were obtained by averaging each of several values in their stabilized region.  $\Delta$ Reflectivity means the difference of SPR reflectivity between before and after exposure to each mixture. ('Mixture #1' solution is a mixture of 10 mM equivalent  $\text{Mg}^{2+}$ ,  $\text{Ni}^{2+}$ ,  $\text{Mn}^{2+}$  and  $\text{Zn}^{2+}$  solution. 'Mixture #2' contained the same concentration and equivalent  $\text{Cu}^{2+}$  solution.)

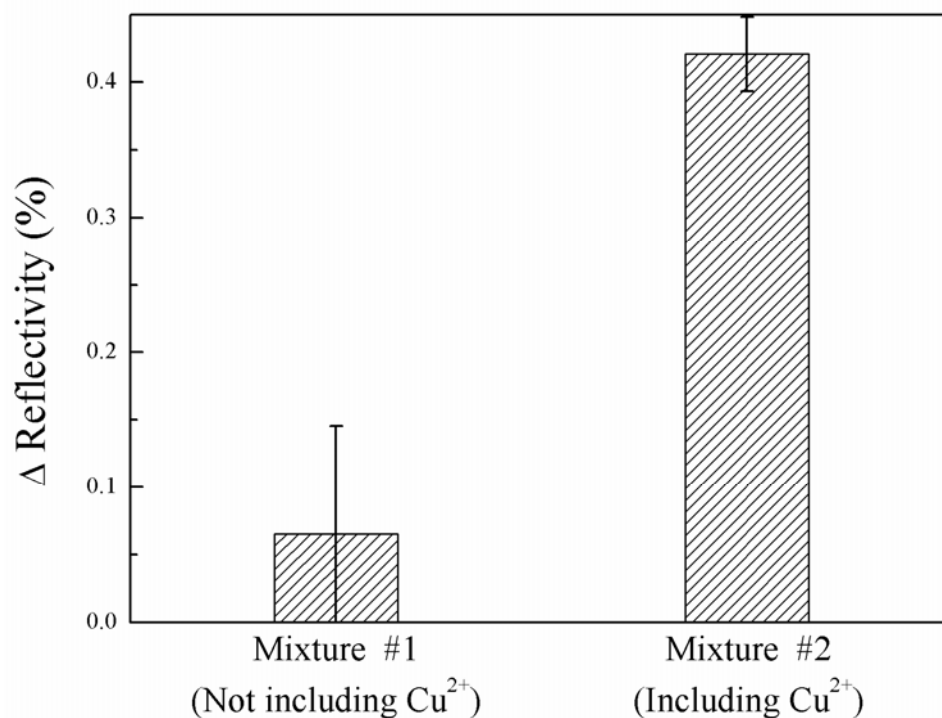

Supplement: b910666a.pdf [file b910666a.pdf]
